# Supplementary material
Source: publisher figshare collection journal article supplement (https://acs.figshare.com/ndownloader/files/5089573)
Supplement: Supplementary file 1 [file 5089573]

HEADER    PROTEIN
REMARK    Para-linked DBA molecule in dimethylformamide
REMARK    Semiempirical AM1-FOMO-CASCI(4/4) for DBA solute
REMARK    OPLS/AA force field for DMF solvent 
REMARK    Result of minimization on S0 
COMPND    para_dmf_s0min.pdb 
AUTHOR    GENERATED BY BABEL 1.3
ATOM      1  N   UNK     1      10.463   0.908  -0.271  1.00  0.00 
ATOM      2  C   UNK     1       9.966   2.221  -0.224  1.00  0.00 
ATOM      3  C   UNK     1       8.498   2.428  -0.245  1.00  0.00 
ATOM      4  C   UNK     1       7.631   1.303  -0.273  1.00  0.00 
ATOM      5  C   UNK     1       8.161  -0.014  -0.341  1.00  0.00 
ATOM      6  C   UNK     1       9.624  -0.216  -0.409  1.00  0.00 
ATOM      7  C   UNK     1       6.225   1.503  -0.242  1.00  0.00 
ATOM      8  C   UNK     1       5.371   0.360  -0.178  1.00  0.00 
ATOM      9  C   UNK     1       5.922  -0.918  -0.224  1.00  0.00 
ATOM     10  C   UNK     1       7.310  -1.106  -0.332  1.00  0.00 
ATOM     11  C   UNK     1       7.980   3.711  -0.218  1.00  0.00 
ATOM     12  C   UNK     1       6.583   3.907  -0.261  1.00  0.00 
ATOM     13  C   UNK     1       5.723   2.832  -0.275  1.00  0.00 
ATOM     14  C   UNK     1       3.973   0.481  -0.071  1.00  0.00 
ATOM     15  C   UNK     1       2.778   0.470   0.008  1.00  0.00 
ATOM     16  C   UNK     1       1.370   0.416   0.078  1.00  0.00 
ATOM     17  C   UNK     1       0.741  -0.773   0.473  1.00  0.00 
ATOM     18  C   UNK     1      -0.646  -0.841   0.549  1.00  0.00 
ATOM     19  C   UNK     1      -1.426   0.278   0.212  1.00  0.00 
ATOM     20  C   UNK     1      -0.798   1.460  -0.199  1.00  0.00 
ATOM     21  C   UNK     1       0.592   1.531  -0.262  1.00  0.00 
ATOM     22  C   UNK     1      -2.830   0.216   0.303  1.00  0.00 
ATOM     23  C   UNK     1      -4.023   0.175   0.399  1.00  0.00 
ATOM     24  C   UNK     1      -5.423   0.146   0.499  1.00  0.00 
ATOM     25  C   UNK     1      -6.074  -1.048   0.881  1.00  0.00 
ATOM     26  C   UNK     1      -7.456  -1.116   0.994  1.00  0.00 
ATOM     27  C   UNK     1      -8.201   0.037   0.717  1.00  0.00 
ATOM     28  C   UNK     1      -7.539   1.259   0.304  1.00  0.00 
ATOM     29  C   UNK     1      -6.161   1.305   0.207  1.00  0.00 
ATOM     30  C   UNK     1      -8.586   2.236   0.072  1.00  0.00 
ATOM     31  C   UNK     1      -9.837   1.576   0.367  1.00  0.00 
ATOM     32  N   UNK     1      -9.589   0.262   0.839  1.00  0.00 
ATOM     33  C   UNK     1      -8.582   3.559  -0.350  1.00  0.00 
ATOM     34  C   UNK     1      -9.800   4.227  -0.480  1.00  0.00 
ATOM     35  C   UNK     1     -11.009   3.588  -0.202  1.00  0.00 
ATOM     36  C   UNK     1     -11.047   2.259   0.225  1.00  0.00 
ATOM     37  O   UNK     1      10.764   3.177  -0.167  1.00  0.00 
ATOM     38  C   UNK     1     -10.552  -0.789   0.731  1.00  0.00 
ATOM     39  O   UNK     1      10.137  -1.338  -0.589  1.00  0.00 
ATOM     40  C   UNK     1      11.887   0.695  -0.148  1.00  0.00 
ATOM     41  H   UNK     1       1.344  -1.662   0.727  1.00  0.00 
ATOM     42  H   UNK     1      -1.137  -1.770   0.884  1.00  0.00 
ATOM     43  H   UNK     1      -1.404   2.338  -0.472  1.00  0.00 
ATOM     44  H   UNK     1       5.263  -1.803  -0.187  1.00  0.00 
ATOM     45  H   UNK     1       7.719  -2.129  -0.403  1.00  0.00 
ATOM     46  H   UNK     1       4.629   2.984  -0.325  1.00  0.00 
ATOM     47  H   UNK     1       6.188   4.936  -0.286  1.00  0.00 
ATOM     48  H   UNK     1       8.656   4.575  -0.178  1.00  0.00 
ATOM     49  H   UNK     1      -5.473  -1.947   1.089  1.00  0.00 
ATOM     50  H   UNK     1      -7.946  -2.053   1.293  1.00  0.00 
ATOM     51  H   UNK     1      -7.632   4.065  -0.577  1.00  0.00 
ATOM     52  H   UNK     1      -5.659   2.221  -0.112  1.00  0.00 
ATOM     53  H   UNK     1     -12.002   1.765   0.451  1.00  0.00 
ATOM     54  H   UNK     1     -11.951   4.145  -0.319  1.00  0.00 
ATOM     55  H   UNK     1      -9.810   5.276  -0.814  1.00  0.00 
ATOM     56  H   UNK     1     -11.516  -0.441   1.196  1.00  0.00 
ATOM     57  H   UNK     1     -10.179  -1.684   1.296  1.00  0.00 
ATOM     58  H   UNK     1     -10.739  -1.083  -0.334  1.00  0.00 
ATOM     59  H   UNK     1      12.360   0.647  -1.164  1.00  0.00 
ATOM     60  H   UNK     1      12.081  -0.268   0.393  1.00  0.00 
ATOM     61  H   UNK     1      12.348   1.543   0.432  1.00  0.00 
ATOM     62  H   UNK     1       1.082   2.469  -0.575  1.00  0.00 
ATOM     63  C   UNK     1       0.756  -5.632  -3.325  1.00  0.00 
ATOM     64  O   UNK     1       1.606  -5.856  -4.188  1.00  0.00 
ATOM     65  N   UNK     1       0.580  -4.454  -2.686  1.00  0.00 
ATOM     66  H   UNK     1       0.084  -6.436  -3.036  1.00  0.00 
ATOM     67  C   UNK     1       1.381  -3.248  -2.926  1.00  0.00 
ATOM     68  C   UNK     1      -0.466  -4.282  -1.666  1.00  0.00 
ATOM     69  H   UNK     1       0.784  -2.434  -3.350  1.00  0.00 
ATOM     70  H   UNK     1       1.887  -2.865  -2.037  1.00  0.00 
ATOM     71  H   UNK     1       2.114  -3.303  -3.733  1.00  0.00 
ATOM     72  H   UNK     1      -0.110  -3.694  -0.818  1.00  0.00 
ATOM     73  H   UNK     1      -1.321  -3.744  -2.075  1.00  0.00 
ATOM     74  H   UNK     1      -0.865  -5.207  -1.240  1.00  0.00 
ATOM     75  C   UNK     1      -1.641   6.670   0.463  1.00  0.00 
ATOM     76  O   UNK     1      -1.223   6.299  -0.633  1.00  0.00 
ATOM     77  N   UNK     1      -2.876   7.172   0.661  1.00  0.00 
ATOM     78  H   UNK     1      -1.065   6.474   1.364  1.00  0.00 
ATOM     79  C   UNK     1      -3.081   8.508   1.224  1.00  0.00 
ATOM     80  C   UNK     1      -4.109   6.420   0.401  1.00  0.00 
ATOM     81  H   UNK     1      -3.485   9.204   0.487  1.00  0.00 
ATOM     82  H   UNK     1      -3.760   8.492   2.076  1.00  0.00 
ATOM     83  H   UNK     1      -2.190   9.067   1.528  1.00  0.00 
ATOM     84  H   UNK     1      -4.638   6.190   1.330  1.00  0.00 
ATOM     85  H   UNK     1      -4.797   7.004  -0.211  1.00  0.00 
ATOM     86  H   UNK     1      -3.971   5.472  -0.125  1.00  0.00 
ATOM     87  C   UNK     1      -1.236   7.978  -4.017  1.00  0.00 
ATOM     88  O   UNK     1      -2.312   7.943  -4.617  1.00  0.00 
ATOM     89  N   UNK     1      -0.098   8.451  -4.564  1.00  0.00 
ATOM     90  H   UNK     1      -1.201   7.805  -2.943  1.00  0.00 
ATOM     91  C   UNK     1       0.603   7.728  -5.628  1.00  0.00 
ATOM     92  C   UNK     1       0.535   9.693  -4.112  1.00  0.00 
ATOM     93  H   UNK     1       1.238   8.352  -6.255  1.00  0.00 
ATOM     94  H   UNK     1       1.187   6.878  -5.271  1.00  0.00 
ATOM     95  H   UNK     1      -0.030   7.424  -6.466  1.00  0.00 
ATOM     96  H   UNK     1       1.589   9.541  -3.875  1.00  0.00 
ATOM     97  H   UNK     1       0.486  10.447  -4.899  1.00  0.00 
ATOM     98  H   UNK     1       0.093  10.145  -3.218  1.00  0.00 
ATOM     99  C   UNK     1      -6.145  -5.943  -4.994  1.00  0.00 
ATOM    100  O   UNK     1      -5.261  -5.603  -4.206  1.00  0.00 
ATOM    101  N   UNK     1      -6.479  -5.189  -6.058  1.00  0.00 
ATOM    102  H   UNK     1      -6.413  -7.002  -5.081  1.00  0.00 
ATOM    103  C   UNK     1      -7.628  -4.283  -6.028  1.00  0.00 
ATOM    104  C   UNK     1      -5.687  -5.193  -7.291  1.00  0.00 
ATOM    105  H   UNK     1      -7.421  -3.318  -6.495  1.00  0.00 
ATOM    106  H   UNK     1      -8.518  -4.705  -6.495  1.00  0.00 
ATOM    107  H   UNK     1      -7.881  -3.884  -5.049  1.00  0.00 
ATOM    108  H   UNK     1      -6.318  -5.166  -8.181  1.00  0.00 
ATOM    109  H   UNK     1      -5.041  -4.314  -7.316  1.00  0.00 
ATOM    110  H   UNK     1      -5.041  -6.064  -7.421  1.00  0.00 
ATOM    111  C   UNK     1       5.618   7.938  -0.438  1.00  0.00 
ATOM    112  O   UNK     1       5.836   7.251   0.559  1.00  0.00 
ATOM    113  N   UNK     1       5.799   9.270  -0.476  1.00  0.00 
ATOM    114  H   UNK     1       4.930   7.557  -1.196  1.00  0.00 
ATOM    115  C   UNK     1       7.055   9.881  -0.914  1.00  0.00 
ATOM    116  C   UNK     1       4.684  10.190  -0.255  1.00  0.00 
ATOM    117  H   UNK     1       6.902  10.675  -1.645  1.00  0.00 
ATOM    118  H   UNK     1       7.638  10.294  -0.092  1.00  0.00 
ATOM    119  H   UNK     1       7.710   9.263  -1.543  1.00  0.00 
ATOM    120  H   UNK     1       4.997  11.027   0.370  1.00  0.00 
ATOM    121  H   UNK     1       4.334  10.608  -1.200  1.00  0.00 
ATOM    122  H   UNK     1       3.817   9.754   0.249  1.00  0.00 
ATOM    123  C   UNK     1      -4.809   0.977  -3.268  1.00  0.00 
ATOM    124  O   UNK     1      -4.926   2.064  -2.698  1.00  0.00 
ATOM    125  N   UNK     1      -4.329   0.864  -4.523  1.00  0.00 
ATOM    126  H   UNK     1      -5.435   0.145  -2.956  1.00  0.00 
ATOM    127  C   UNK     1      -5.140   1.278  -5.671  1.00  0.00 
ATOM    128  C   UNK     1      -2.996   0.328  -4.812  1.00  0.00 
ATOM    129  H   UNK     1      -4.586   1.506  -6.584  1.00  0.00 
ATOM    130  H   UNK     1      -5.967   0.610  -5.910  1.00  0.00 
ATOM    131  H   UNK     1      -5.469   2.320  -5.644  1.00  0.00 
ATOM    132  H   UNK     1      -3.011  -0.330  -5.683  1.00  0.00 
ATOM    133  H   UNK     1      -2.312   1.144  -5.054  1.00  0.00 
ATOM    134  H   UNK     1      -2.536  -0.246  -4.006  1.00  0.00 
ATOM    135  C   UNK     1      11.562   7.512   4.073  1.00  0.00 
ATOM    136  O   UNK     1      10.792   8.040   4.871  1.00  0.00 
ATOM    137  N   UNK     1      12.851   7.862   3.880  1.00  0.00 
ATOM    138  H   UNK     1      11.159   6.820   3.337  1.00  0.00 
ATOM    139  C   UNK     1      13.327   9.249   3.803  1.00  0.00 
ATOM    140  C   UNK     1      13.892   6.839   3.718  1.00  0.00 
ATOM    141  H   UNK     1      14.117   9.449   4.528  1.00  0.00 
ATOM    142  H   UNK     1      13.692   9.527   2.812  1.00  0.00 
ATOM    143  H   UNK     1      12.645  10.020   4.160  1.00  0.00 
ATOM    144  H   UNK     1      14.637   7.124   2.973  1.00  0.00 
ATOM    145  H   UNK     1      14.414   6.689   4.663  1.00  0.00 
ATOM    146  H   UNK     1      13.546   5.852   3.408  1.00  0.00 
ATOM    147  C   UNK     1     -12.306  -3.792   2.946  1.00  0.00 
ATOM    148  O   UNK     1     -12.172  -2.574   2.808  1.00  0.00 
ATOM    149  N   UNK     1     -13.396  -4.434   2.482  1.00  0.00 
ATOM    150  H   UNK     1     -11.403  -4.396   2.950  1.00  0.00 
ATOM    151  C   UNK     1     -14.704  -4.363   3.140  1.00  0.00 
ATOM    152  C   UNK     1     -13.337  -5.250   1.266  1.00  0.00 
ATOM    153  H   UNK     1     -15.414  -3.768   2.560  1.00  0.00 
ATOM    154  H   UNK     1     -15.138  -5.350   3.308  1.00  0.00 
ATOM    155  H   UNK     1     -14.743  -3.801   4.076  1.00  0.00 
ATOM    156  H   UNK     1     -13.032  -6.275   1.492  1.00  0.00 
ATOM    157  H   UNK     1     -14.298  -5.307   0.749  1.00  0.00 
ATOM    158  H   UNK     1     -12.651  -4.855   0.513  1.00  0.00 
ATOM    159  C   UNK     1     -14.812   6.471  -5.207  1.00  0.00 
ATOM    160  O   UNK     1     -14.070   7.391  -5.566  1.00  0.00 
ATOM    161  N   UNK     1     -16.134   6.491  -5.458  1.00  0.00 
ATOM    162  H   UNK     1     -14.459   5.736  -4.500  1.00  0.00 
ATOM    163  C   UNK     1     -16.653   6.017  -6.741  1.00  0.00 
ATOM    164  C   UNK     1     -17.110   7.072  -4.530  1.00  0.00 
ATOM    165  H   UNK     1     -17.447   5.279  -6.626  1.00  0.00 
ATOM    166  H   UNK     1     -17.014   6.835  -7.367  1.00  0.00 
ATOM    167  H   UNK     1     -15.992   5.381  -7.337  1.00  0.00 
ATOM    168  H   UNK     1     -17.752   7.799  -5.028  1.00  0.00 
ATOM    169  H   UNK     1     -17.760   6.297  -4.123  1.00  0.00 
ATOM    170  H   UNK     1     -16.677   7.590  -3.672  1.00  0.00 
ATOM    171  C   UNK     1       7.767  -2.331   3.153  1.00  0.00 
ATOM    172  O   UNK     1       8.523  -1.382   2.954  1.00  0.00 
ATOM    173  N   UNK     1       7.779  -3.054   4.290  1.00  0.00 
ATOM    174  H   UNK     1       7.056  -2.659   2.398  1.00  0.00 
ATOM    175  C   UNK     1       8.644  -4.226   4.435  1.00  0.00 
ATOM    176  C   UNK     1       7.067  -2.619   5.495  1.00  0.00 
ATOM    177  H   UNK     1       9.640  -3.958   4.794  1.00  0.00 
ATOM    178  H   UNK     1       8.235  -4.992   5.096  1.00  0.00 
ATOM    179  H   UNK     1       8.921  -4.720   3.501  1.00  0.00 
ATOM    180  H   UNK     1       6.652  -3.470   6.039  1.00  0.00 
ATOM    181  H   UNK     1       7.737  -2.095   6.178  1.00  0.00 
ATOM    182  H   UNK     1       6.227  -1.946   5.309  1.00  0.00 
ATOM    183  C   UNK     1      -2.559  -8.113   6.125  1.00  0.00 
ATOM    184  O   UNK     1      -3.723  -7.746   6.340  1.00  0.00 
ATOM    185  N   UNK     1      -2.017  -8.147   4.895  1.00  0.00 
ATOM    186  H   UNK     1      -1.965  -8.549   6.911  1.00  0.00 
ATOM    187  C   UNK     1      -2.097  -9.331   4.035  1.00  0.00 
ATOM    188  C   UNK     1      -1.323  -6.997   4.315  1.00  0.00 
ATOM    189  H   UNK     1      -2.558  -9.105   3.072  1.00  0.00 
ATOM    190  H   UNK     1      -1.118  -9.777   3.845  1.00  0.00 
ATOM    191  H   UNK     1      -2.804 -10.110   4.332  1.00  0.00 
ATOM    192  H   UNK     1      -0.314  -7.264   3.993  1.00  0.00 
ATOM    193  H   UNK     1      -1.839  -6.644   3.411  1.00  0.00 
ATOM    194  H   UNK     1      -1.220  -6.130   4.968  1.00  0.00 
ATOM    195  C   UNK     1       9.919  -6.754   1.399  1.00  0.00 
ATOM    196  O   UNK     1       9.410  -7.851   1.169  1.00  0.00 
ATOM    197  N   UNK     1      10.984  -6.585   2.204  1.00  0.00 
ATOM    198  H   UNK     1       9.284  -5.872   1.329  1.00  0.00 
ATOM    199  C   UNK     1      11.024  -7.047   3.594  1.00  0.00 
ATOM    200  C   UNK     1      12.148  -5.807   1.773  1.00  0.00 
ATOM    201  H   UNK     1      11.888  -7.684   3.795  1.00  0.00 
ATOM    202  H   UNK     1      11.027  -6.232   4.319  1.00  0.00 
ATOM    203  H   UNK     1      10.294  -7.808   3.882  1.00  0.00 
ATOM    204  H   UNK     1      12.340  -4.960   2.435  1.00  0.00 
ATOM    205  H   UNK     1      13.044  -6.430   1.781  1.00  0.00 
ATOM    206  H   UNK     1      12.086  -5.382   0.769  1.00  0.00 
ATOM    207  C   UNK     1     -10.917   7.853   4.683  1.00  0.00 
ATOM    208  O   UNK     1     -12.041   7.574   5.108  1.00  0.00 
ATOM    209  N   UNK     1      -9.772   7.357   5.187  1.00  0.00 
ATOM    210  H   UNK     1     -10.812   8.532   3.842  1.00  0.00 
ATOM    211  C   UNK     1      -9.256   6.046   4.790  1.00  0.00 
ATOM    212  C   UNK     1      -8.986   8.056   6.209  1.00  0.00 
ATOM    213  H   UNK     1      -8.195   6.059   4.534  1.00  0.00 
ATOM    214  H   UNK     1      -9.422   5.283   5.553  1.00  0.00 
ATOM    215  H   UNK     1      -9.563   5.660   3.818  1.00  0.00 
ATOM    216  H   UNK     1      -8.859   7.428   7.093  1.00  0.00 
ATOM    217  H   UNK     1      -7.989   8.292   5.833  1.00  0.00 
ATOM    218  H   UNK     1      -9.415   8.995   6.568  1.00  0.00 
ATOM    219  C   UNK     1      14.175   6.810  -0.983  1.00  0.00 
ATOM    220  O   UNK     1      14.262   7.528   0.020  1.00  0.00 
ATOM    221  N   UNK     1      14.272   7.252  -2.249  1.00  0.00 
ATOM    222  H   UNK     1      13.786   5.790  -0.888  1.00  0.00 
ATOM    223  C   UNK     1      15.533   7.155  -2.987  1.00  0.00 
ATOM    224  C   UNK     1      13.114   7.801  -2.962  1.00  0.00 
ATOM    225  H   UNK     1      15.421   6.900  -4.043  1.00  0.00 
ATOM    226  H   UNK     1      16.172   8.034  -2.905  1.00  0.00 
ATOM    227  H   UNK     1      16.101   6.242  -2.836  1.00  0.00 
ATOM    228  H   UNK     1      13.292   7.990  -4.022  1.00  0.00 
ATOM    229  H   UNK     1      12.247   7.138  -2.931  1.00  0.00 
ATOM    230  H   UNK     1      12.804   8.756  -2.533  1.00  0.00 
ATOM    231  C   UNK     1       9.347  -1.598  -3.889  1.00  0.00 
ATOM    232  O   UNK     1       9.340  -2.262  -4.924  1.00  0.00 
ATOM    233  N   UNK     1       9.259  -0.253  -3.890  1.00  0.00 
ATOM    234  H   UNK     1       9.309  -2.090  -2.918  1.00  0.00 
ATOM    235  C   UNK     1      10.447   0.591  -4.033  1.00  0.00 
ATOM    236  C   UNK     1       7.977   0.447  -3.804  1.00  0.00 
ATOM    237  H   UNK     1      10.287   1.543  -4.543  1.00  0.00 
ATOM    238  H   UNK     1      10.967   0.779  -3.095  1.00  0.00 
ATOM    239  H   UNK     1      11.157   0.246  -4.788  1.00  0.00 
ATOM    240  H   UNK     1       8.033   1.299  -3.127  1.00  0.00 
ATOM    241  H   UNK     1       7.687   0.836  -4.781  1.00  0.00 
ATOM    242  H   UNK     1       7.154  -0.167  -3.434  1.00  0.00 
ATOM    243  C   UNK     1     -16.250   9.940   3.163  1.00  0.00 
ATOM    244  O   UNK     1     -16.955  10.390   2.261  1.00  0.00 
ATOM    245  N   UNK     1     -15.307   8.999   2.968  1.00  0.00 
ATOM    246  H   UNK     1     -16.365  10.292   4.192  1.00  0.00 
ATOM    247  C   UNK     1     -13.918   9.367   2.678  1.00  0.00 
ATOM    248  C   UNK     1     -15.536   7.579   3.247  1.00  0.00 
ATOM    249  H   UNK     1     -13.410   9.667   3.595  1.00  0.00 
ATOM    250  H   UNK     1     -13.344   8.539   2.251  1.00  0.00 
ATOM    251  H   UNK     1     -13.825  10.172   1.946  1.00  0.00 
ATOM    252  H   UNK     1     -15.184   6.977   2.406  1.00  0.00 
ATOM    253  H   UNK     1     -14.976   7.256   4.128  1.00  0.00 
ATOM    254  H   UNK     1     -16.579   7.295   3.397  1.00  0.00 
ATOM    255  C   UNK     1       7.911   6.452  -2.801  1.00  0.00 
ATOM    256  O   UNK     1       6.750   6.717  -3.121  1.00  0.00 
ATOM    257  N   UNK     1       8.675   5.605  -3.516  1.00  0.00 
ATOM    258  H   UNK     1       8.233   6.604  -1.766  1.00  0.00 
ATOM    259  C   UNK     1       8.479   4.155  -3.483  1.00  0.00 
ATOM    260  C   UNK     1       9.753   6.081  -4.383  1.00  0.00 
ATOM    261  H   UNK     1       8.314   3.723  -4.469  1.00  0.00 
ATOM    262  H   UNK     1       9.300   3.626  -2.998  1.00  0.00 
ATOM    263  H   UNK     1       7.529   3.801  -3.068  1.00  0.00 
ATOM    264  H   UNK     1      10.641   5.451  -4.314  1.00  0.00 
ATOM    265  H   UNK     1       9.432   6.073  -5.426  1.00  0.00 
ATOM    266  H   UNK     1      10.105   7.092  -4.163  1.00  0.00 
ATOM    267  C   UNK     1     -16.350  -7.312  -4.271  1.00  0.00 
ATOM    268  O   UNK     1     -17.427  -6.728  -4.195  1.00  0.00 
ATOM    269  N   UNK     1     -15.650  -7.766  -3.211  1.00  0.00 
ATOM    270  H   UNK     1     -15.877  -7.458  -5.241  1.00  0.00 
ATOM    271  C   UNK     1     -15.467  -6.986  -1.983  1.00  0.00 
ATOM    272  C   UNK     1     -14.977  -9.067  -3.237  1.00  0.00 
ATOM    273  H   UNK     1     -15.506  -7.596  -1.079  1.00  0.00 
ATOM    274  H   UNK     1     -14.527  -6.435  -1.987  1.00  0.00 
ATOM    275  H   UNK     1     -16.287  -6.307  -1.740  1.00  0.00 
ATOM    276  H   UNK     1     -14.034  -9.052  -2.688  1.00  0.00 
ATOM    277  H   UNK     1     -15.608  -9.825  -2.770  1.00  0.00 
ATOM    278  H   UNK     1     -14.714  -9.431  -4.238  1.00  0.00 
ATOM    279  C   UNK     1      -7.434   7.554  -2.133  1.00  0.00 
ATOM    280  O   UNK     1      -7.173   7.856  -0.969  1.00  0.00 
ATOM    281  N   UNK     1      -6.552   7.733  -3.137  1.00  0.00 
ATOM    282  H   UNK     1      -8.319   6.972  -2.376  1.00  0.00 
ATOM    283  C   UNK     1      -5.578   6.695  -3.474  1.00  0.00 
ATOM    284  C   UNK     1      -6.396   9.024  -3.805  1.00  0.00 
ATOM    285  H   UNK     1      -5.212   6.748  -4.498  1.00  0.00 
ATOM    286  H   UNK     1      -4.711   6.675  -2.809  1.00  0.00 
ATOM    287  H   UNK     1      -5.995   5.693  -3.602  1.00  0.00 
ATOM    288  H   UNK     1      -5.433   9.469  -3.547  1.00  0.00 
ATOM    289  H   UNK     1      -6.422   8.901  -4.889  1.00  0.00 
ATOM    290  H   UNK     1      -7.167   9.779  -3.566  1.00  0.00 
ATOM    291  C   UNK     1     -14.628  -4.896  -6.407  1.00  0.00 
ATOM    292  O   UNK     1     -14.309  -6.047  -6.712  1.00  0.00 
ATOM    293  N   UNK     1     -14.222  -4.279  -5.279  1.00  0.00 
ATOM    294  H   UNK     1     -15.057  -4.238  -7.175  1.00  0.00 
ATOM    295  C   UNK     1     -12.847  -3.828  -5.070  1.00  0.00 
ATOM    296  C   UNK     1     -15.157  -3.891  -4.217  1.00  0.00 
ATOM    297  H   UNK     1     -12.741  -2.758  -5.227  1.00  0.00 
ATOM    298  H   UNK     1     -12.498  -4.058  -4.058  1.00  0.00 
ATOM    299  H   UNK     1     -12.094  -4.206  -5.770  1.00  0.00 
ATOM    300  H   UNK     1     -14.883  -4.399  -3.293  1.00  0.00 
ATOM    301  H   UNK     1     -15.118  -2.821  -3.999  1.00  0.00 
ATOM    302  H   UNK     1     -16.211  -4.128  -4.393  1.00  0.00 
ATOM    303  C   UNK     1      15.312  -3.383  -2.802  1.00  0.00 
ATOM    304  O   UNK     1      15.412  -3.352  -4.025  1.00  0.00 
ATOM    305  N   UNK     1      14.724  -2.397  -2.099  1.00  0.00 
ATOM    306  H   UNK     1      16.044  -3.952  -2.236  1.00  0.00 
ATOM    307  C   UNK     1      13.281  -2.380  -1.860  1.00  0.00 
ATOM    308  C   UNK     1      15.509  -1.308  -1.519  1.00  0.00 
ATOM    309  H   UNK     1      13.000  -2.107  -0.843  1.00  0.00 
ATOM    310  H   UNK     1      12.723  -1.757  -2.560  1.00  0.00 
ATOM    311  H   UNK     1      12.798  -3.351  -1.747  1.00  0.00 
ATOM    312  H   UNK     1      14.899  -0.463  -1.192  1.00  0.00 
ATOM    313  H   UNK     1      16.055  -1.658  -0.641  1.00  0.00 
ATOM    314  H   UNK     1      16.245  -0.894  -2.211  1.00  0.00 
ATOM    315  C   UNK     1     -11.812   9.003  -2.303  1.00  0.00 
ATOM    316  O   UNK     1     -10.746   8.694  -2.840  1.00  0.00 
ATOM    317  N   UNK     1     -12.614   9.977  -2.775  1.00  0.00 
ATOM    318  H   UNK     1     -11.887   8.861  -1.221  1.00  0.00 
ATOM    319  C   UNK     1     -13.872   9.685  -3.464  1.00  0.00 
ATOM    320  C   UNK     1     -12.387  11.399  -2.505  1.00  0.00 
ATOM    321  H   UNK     1     -14.727  10.287  -3.147  1.00  0.00 
ATOM    322  H   UNK     1     -13.790   9.739  -4.550  1.00  0.00 
ATOM    323  H   UNK     1     -14.403   8.783  -3.168  1.00  0.00 
ATOM    324  H   UNK     1     -12.723  12.033  -3.328  1.00  0.00 
ATOM    325  H   UNK     1     -12.941  11.707  -1.615  1.00  0.00 
ATOM    326  H   UNK     1     -11.338  11.659  -2.354  1.00  0.00 
ATOM    327  C   UNK     1     -14.048   2.273   3.628  1.00  0.00 
ATOM    328  O   UNK     1     -15.219   2.385   4.012  1.00  0.00 
ATOM    329  N   UNK     1     -13.149   3.277   3.601  1.00  0.00 
ATOM    330  H   UNK     1     -13.800   1.434   2.977  1.00  0.00 
ATOM    331  C   UNK     1     -11.780   3.089   4.088  1.00  0.00 
ATOM    332  C   UNK     1     -13.405   4.572   2.962  1.00  0.00 
ATOM    333  H   UNK     1     -11.030   3.171   3.299  1.00  0.00 
ATOM    334  H   UNK     1     -11.514   3.786   4.886  1.00  0.00 
ATOM    335  H   UNK     1     -11.502   2.084   4.411  1.00  0.00 
ATOM    336  H   UNK     1     -13.162   5.392   3.641  1.00  0.00 
ATOM    337  H   UNK     1     -12.802   4.702   2.061  1.00  0.00 
ATOM    338  H   UNK     1     -14.443   4.737   2.666  1.00  0.00 
ATOM    339  C   UNK     1      15.337   0.770   1.941  1.00  0.00 
ATOM    340  O   UNK     1      15.274  -0.397   1.544  1.00  0.00 
ATOM    341  N   UNK     1      16.371   1.604   1.689  1.00  0.00 
ATOM    342  H   UNK     1      14.386   1.291   2.033  1.00  0.00 
ATOM    343  C   UNK     1      17.676   1.146   1.198  1.00  0.00 
ATOM    344  C   UNK     1      16.369   2.990   2.168  1.00  0.00 
ATOM    345  H   UNK     1      18.223   1.873   0.598  1.00  0.00 
ATOM    346  H   UNK     1      18.327   0.792   2.000  1.00  0.00 
ATOM    347  H   UNK     1      17.626   0.381   0.419  1.00  0.00 
ATOM    348  H   UNK     1      16.992   3.085   3.059  1.00  0.00 
ATOM    349  H   UNK     1      16.756   3.673   1.423  1.00  0.00 
ATOM    350  H   UNK     1      15.390   3.399   2.438  1.00  0.00 
ATOM    351  C   UNK     1      -6.911  -6.085   2.793  1.00  0.00 
ATOM    352  O   UNK     1      -6.636  -5.575   1.706  1.00  0.00 
ATOM    353  N   UNK     1      -6.836  -7.412   3.016  1.00  0.00 
ATOM    354  H   UNK     1      -6.939  -5.468   3.686  1.00  0.00 
ATOM    355  C   UNK     1      -5.586  -8.064   3.418  1.00  0.00 
ATOM    356  C   UNK     1      -8.028  -8.264   3.059  1.00  0.00 
ATOM    357  H   UNK     1      -5.607  -8.416   4.451  1.00  0.00 
ATOM    358  H   UNK     1      -5.323  -8.904   2.773  1.00  0.00 
ATOM    359  H   UNK     1      -4.705  -7.428   3.530  1.00  0.00 
ATOM    360  H   UNK     1      -7.850  -9.233   2.592  1.00  0.00 
ATOM    361  H   UNK     1      -8.323  -8.454   4.093  1.00  0.00 
ATOM    362  H   UNK     1      -8.903  -7.854   2.545  1.00  0.00 
ATOM    363  C   UNK     1       2.542   2.761  -3.292  1.00  0.00 
ATOM    364  O   UNK     1       2.703   3.492  -2.318  1.00  0.00 
ATOM    365  N   UNK     1       3.090   1.537  -3.399  1.00  0.00 
ATOM    366  H   UNK     1       2.138   3.177  -4.225  1.00  0.00 
ATOM    367  C   UNK     1       4.529   1.371  -3.610  1.00  0.00 
ATOM    368  C   UNK     1       2.289   0.312  -3.460  1.00  0.00 
ATOM    369  H   UNK     1       4.940   0.514  -3.077  1.00  0.00 
ATOM    370  H   UNK     1       4.816   1.299  -4.659  1.00  0.00 
ATOM    371  H   UNK     1       5.176   2.087  -3.092  1.00  0.00 
ATOM    372  H   UNK     1       2.216  -0.060  -4.483  1.00  0.00 
ATOM    373  H   UNK     1       2.741  -0.483  -2.863  1.00  0.00 
ATOM    374  H   UNK     1       1.270   0.409  -3.065  1.00  0.00 
ATOM    375  C   UNK     1       5.277   2.628   3.218  1.00  0.00 
ATOM    376  O   UNK     1       4.257   2.276   3.812  1.00  0.00 
ATOM    377  N   UNK     1       6.496   2.626   3.794  1.00  0.00 
ATOM    378  H   UNK     1       5.180   3.287   2.356  1.00  0.00 
ATOM    379  C   UNK     1       7.251   3.864   4.013  1.00  0.00 
ATOM    380  C   UNK     1       7.192   1.390   4.166  1.00  0.00 
ATOM    381  H   UNK     1       7.612   3.981   5.037  1.00  0.00 
ATOM    382  H   UNK     1       8.095   3.975   3.331  1.00  0.00 
ATOM    383  H   UNK     1       6.675   4.792   4.024  1.00  0.00 
ATOM    384  H   UNK     1       8.094   1.254   3.567  1.00  0.00 
ATOM    385  H   UNK     1       7.491   1.423   5.214  1.00  0.00 
ATOM    386  H   UNK     1       6.601   0.478   4.054  1.00  0.00 
ATOM    387  C   UNK     1     -11.204  -0.942  -3.436  1.00  0.00 
ATOM    388  O   UNK     1     -10.916  -1.964  -2.810  1.00  0.00 
ATOM    389  N   UNK     1     -10.534  -0.472  -4.506  1.00  0.00 
ATOM    390  H   UNK     1     -12.234  -0.583  -3.359  1.00  0.00 
ATOM    391  C   UNK     1      -9.832  -1.326  -5.473  1.00  0.00 
ATOM    392  C   UNK     1     -10.466   0.971  -4.767  1.00  0.00 
ATOM    393  H   UNK     1     -10.196  -1.196  -6.494  1.00  0.00 
ATOM    394  H   UNK     1      -8.752  -1.163  -5.466  1.00  0.00 
ATOM    395  H   UNK     1     -10.007  -2.399  -5.366  1.00  0.00 
ATOM    396  H   UNK     1      -9.773   1.473  -4.087  1.00  0.00 
ATOM    397  H   UNK     1     -10.115   1.219  -5.770  1.00  0.00 
ATOM    398  H   UNK     1     -11.437   1.468  -4.693  1.00  0.00 
ATOM    399  C   UNK     1      15.063  -2.137   4.880  1.00  0.00 
ATOM    400  O   UNK     1      16.042  -2.811   5.209  1.00  0.00 
ATOM    401  N   UNK     1      14.001  -1.958   5.689  1.00  0.00 
ATOM    402  H   UNK     1      15.037  -1.618   3.926  1.00  0.00 
ATOM    403  C   UNK     1      12.770  -2.715   5.465  1.00  0.00 
ATOM    404  C   UNK     1      13.883  -0.772   6.536  1.00  0.00 
ATOM    405  H   UNK     1      12.069  -2.752   6.302  1.00  0.00 
ATOM    406  H   UNK     1      12.238  -2.428   4.557  1.00  0.00 
ATOM    407  H   UNK     1      12.873  -3.799   5.517  1.00  0.00 
ATOM    408  H   UNK     1      13.531   0.064   5.930  1.00  0.00 
ATOM    409  H   UNK     1      13.178  -0.907   7.360  1.00  0.00 
ATOM    410  H   UNK     1      14.825  -0.475   7.006  1.00  0.00 
ATOM    411  C   UNK     1       6.545  -7.204   2.565  1.00  0.00 
ATOM    412  O   UNK     1       5.748  -6.423   2.045  1.00  0.00 
ATOM    413  N   UNK     1       6.318  -8.519   2.768  1.00  0.00 
ATOM    414  H   UNK     1       7.347  -6.772   3.166  1.00  0.00 
ATOM    415  C   UNK     1       5.730  -9.375   1.731  1.00  0.00 
ATOM    416  C   UNK     1       6.993  -9.238   3.856  1.00  0.00 
ATOM    417  H   UNK     1       6.480  -9.709   1.012  1.00  0.00 
ATOM    418  H   UNK     1       5.212 -10.251   2.128  1.00  0.00 
ATOM    419  H   UNK     1       5.007  -8.868   1.089  1.00  0.00 
ATOM    420  H   UNK     1       6.430 -10.111   4.191  1.00  0.00 
ATOM    421  H   UNK     1       7.971  -9.595   3.524  1.00  0.00 
ATOM    422  H   UNK     1       7.157  -8.649   4.761  1.00  0.00 
ATOM    423  C   UNK     1     -16.066  -1.702  -0.671  1.00  0.00 
ATOM    424  O   UNK     1     -16.306  -1.130  -1.731  1.00  0.00 
ATOM    425  N   UNK     1     -14.890  -1.578  -0.023  1.00  0.00 
ATOM    426  H   UNK     1     -16.724  -2.464  -0.280  1.00  0.00 
ATOM    427  C   UNK     1     -14.731  -0.682   1.125  1.00  0.00 
ATOM    428  C   UNK     1     -13.644  -2.094  -0.598  1.00  0.00 
ATOM    429  H   UNK     1     -14.462  -1.218   2.035  1.00  0.00 
ATOM    430  H   UNK     1     -13.981   0.093   0.958  1.00  0.00 
ATOM    431  H   UNK     1     -15.639  -0.200   1.524  1.00  0.00 
ATOM    432  H   UNK     1     -13.212  -1.327  -1.241  1.00  0.00 
ATOM    433  H   UNK     1     -12.896  -2.343   0.154  1.00  0.00 
ATOM    434  H   UNK     1     -13.752  -3.003  -1.195  1.00  0.00 
ATOM    435  C   UNK     1      -2.243  -3.117   3.851  1.00  0.00 
ATOM    436  O   UNK     1      -1.117  -3.619   3.881  1.00  0.00 
ATOM    437  N   UNK     1      -2.553  -2.003   4.534  1.00  0.00 
ATOM    438  H   UNK     1      -2.950  -3.394   3.065  1.00  0.00 
ATOM    439  C   UNK     1      -2.157  -0.693   4.012  1.00  0.00 
ATOM    440  C   UNK     1      -3.057  -2.058   5.909  1.00  0.00 
ATOM    441  H   UNK     1      -2.587   0.168   4.519  1.00  0.00 
ATOM    442  H   UNK     1      -1.080  -0.539   3.933  1.00  0.00 
ATOM    443  H   UNK     1      -2.658  -0.406   3.087  1.00  0.00 
ATOM    444  H   UNK     1      -2.229  -2.159   6.615  1.00  0.00 
ATOM    445  H   UNK     1      -3.605  -1.157   6.192  1.00  0.00 
ATOM    446  H   UNK     1      -3.751  -2.884   6.093  1.00  0.00 
ATOM    447  C   UNK     1       1.645   4.452   4.566  1.00  0.00 
ATOM    448  O   UNK     1       1.435   5.668   4.597  1.00  0.00 
ATOM    449  N   UNK     1       0.747   3.581   4.065  1.00  0.00 
ATOM    450  H   UNK     1       2.375   4.019   5.236  1.00  0.00 
ATOM    451  C   UNK     1      -0.471   3.217   4.792  1.00  0.00 
ATOM    452  C   UNK     1       0.974   2.856   2.814  1.00  0.00 
ATOM    453  H   UNK     1      -1.258   2.800   4.161  1.00  0.00 
ATOM    454  H   UNK     1      -0.282   2.514   5.605  1.00  0.00 
ATOM    455  H   UNK     1      -1.034   4.077   5.160  1.00  0.00 
ATOM    456  H   UNK     1       0.925   1.778   2.967  1.00  0.00 
ATOM    457  H   UNK     1       0.203   3.120   2.090  1.00  0.00 
ATOM    458  H   UNK     1       1.932   3.042   2.324  1.00  0.00 
ATOM    459  C   UNK     1       6.313   9.597  -4.873  1.00  0.00 
ATOM    460  O   UNK     1       6.706  10.530  -4.168  1.00  0.00 
ATOM    461  N   UNK     1       5.028   9.417  -5.241  1.00  0.00 
ATOM    462  H   UNK     1       7.013   8.821  -5.181  1.00  0.00 
ATOM    463  C   UNK     1       4.174  10.511  -5.712  1.00  0.00 
ATOM    464  C   UNK     1       4.355   8.126  -5.082  1.00  0.00 
ATOM    465  H   UNK     1       3.473  10.224  -6.497  1.00  0.00 
ATOM    466  H   UNK     1       3.616  10.987  -4.901  1.00  0.00 
ATOM    467  H   UNK     1       4.685  11.287  -6.286  1.00  0.00 
ATOM    468  H   UNK     1       3.669   8.151  -4.234  1.00  0.00 
ATOM    469  H   UNK     1       3.775   7.858  -5.966  1.00  0.00 
ATOM    470  H   UNK     1       5.012   7.271  -4.911  1.00  0.00 
ATOM    471  C   UNK     1      10.836   8.153   0.158  1.00  0.00 
ATOM    472  O   UNK     1      10.374   7.819  -0.943  1.00  0.00 
ATOM    473  N   UNK     1      10.142   8.842   1.085  1.00  0.00 
ATOM    474  H   UNK     1      11.686   7.608   0.563  1.00  0.00 
ATOM    475  C   UNK     1       8.900   8.339   1.679  1.00  0.00 
ATOM    476  C   UNK     1      10.600  10.135   1.603  1.00  0.00 
ATOM    477  H   UNK     1       9.055   7.799   2.606  1.00  0.00 
ATOM    478  H   UNK     1       8.162   9.120   1.866  1.00  0.00 
ATOM    479  H   UNK     1       8.391   7.544   1.129  1.00  0.00 
ATOM    480  H   UNK     1      10.012  10.949   1.175  1.00  0.00 
ATOM    481  H   UNK     1      10.479  10.193   2.687  1.00  0.00 
ATOM    482  H   UNK     1      11.649  10.371   1.407  1.00  0.00 
ATOM    483  C   UNK     1      -2.965   9.594   4.934  1.00  0.00 
ATOM    484  O   UNK     1      -3.310  10.283   3.972  1.00  0.00 
ATOM    485  N   UNK     1      -2.647   8.287   4.844  1.00  0.00 
ATOM    486  H   UNK     1      -2.867  10.041   5.923  1.00  0.00 
ATOM    487  C   UNK     1      -1.277   7.835   4.581  1.00  0.00 
ATOM    488  C   UNK     1      -3.645   7.225   5.011  1.00  0.00 
ATOM    489  H   UNK     1      -0.826   7.360   5.455  1.00  0.00 
ATOM    490  H   UNK     1      -1.226   7.123   3.756  1.00  0.00 
ATOM    491  H   UNK     1      -0.532   8.607   4.372  1.00  0.00 
ATOM    492  H   UNK     1      -3.852   6.746   4.053  1.00  0.00 
ATOM    493  H   UNK     1      -3.305   6.444   5.693  1.00  0.00 
ATOM    494  H   UNK     1      -4.616   7.557   5.387  1.00  0.00 
ATOM    495  C   UNK     1      16.934  -5.694  -6.015  1.00  0.00 
ATOM    496  O   UNK     1      17.826  -6.161  -6.734  1.00  0.00 
ATOM    497  N   UNK     1      16.239  -6.446  -5.141  1.00  0.00 
ATOM    498  H   UNK     1      16.906  -4.621  -5.828  1.00  0.00 
ATOM    499  C   UNK     1      14.790  -6.592  -5.279  1.00  0.00 
ATOM    500  C   UNK     1      16.816  -6.945  -3.889  1.00  0.00 
ATOM    501  H   UNK     1      14.375  -7.489  -4.822  1.00  0.00 
ATOM    502  H   UNK     1      14.225  -5.722  -4.925  1.00  0.00 
ATOM    503  H   UNK     1      14.440  -6.858  -6.275  1.00  0.00 
ATOM    504  H   UNK     1      16.542  -6.302  -3.051  1.00  0.00 
ATOM    505  H   UNK     1      16.466  -7.954  -3.668  1.00  0.00 
ATOM    506  H   UNK     1      17.907  -7.014  -3.895  1.00  0.00 
ATOM    507  C   UNK     1      14.958   3.045  -3.770  1.00  0.00 
ATOM    508  O   UNK     1      14.894   4.178  -4.254  1.00  0.00 
ATOM    509  N   UNK     1      15.413   2.803  -2.526  1.00  0.00 
ATOM    510  H   UNK     1      14.846   2.170  -4.407  1.00  0.00 
ATOM    511  C   UNK     1      14.572   2.985  -1.341  1.00  0.00 
ATOM    512  C   UNK     1      16.805   2.430  -2.258  1.00  0.00 
ATOM    513  H   UNK     1      14.514   2.081  -0.734  1.00  0.00 
ATOM    514  H   UNK     1      14.944   3.793  -0.710  1.00  0.00 
ATOM    515  H   UNK     1      13.505   3.150  -1.511  1.00  0.00 
ATOM    516  H   UNK     1      17.326   3.220  -1.713  1.00  0.00 
ATOM    517  H   UNK     1      16.853   1.532  -1.641  1.00  0.00 
ATOM    518  H   UNK     1      17.412   2.213  -3.141  1.00  0.00 
ATOM    519  C   UNK     1       3.752  -2.316   2.514  1.00  0.00 
ATOM    520  O   UNK     1       3.486  -2.845   1.431  1.00  0.00 
ATOM    521  N   UNK     1       3.481  -2.879   3.707  1.00  0.00 
ATOM    522  H   UNK     1       4.493  -1.511   2.549  1.00  0.00 
ATOM    523  C   UNK     1       3.931  -4.225   4.070  1.00  0.00 
ATOM    524  C   UNK     1       2.769  -2.154   4.762  1.00  0.00 
ATOM    525  H   UNK     1       4.450  -4.278   5.032  1.00  0.00 
ATOM    526  H   UNK     1       3.122  -4.954   4.068  1.00  0.00 
ATOM    527  H   UNK     1       4.755  -4.617   3.468  1.00  0.00 
ATOM    528  H   UNK     1       2.085  -2.815   5.304  1.00  0.00 
ATOM    529  H   UNK     1       3.477  -1.739   5.482  1.00  0.00 
ATOM    530  H   UNK     1       2.141  -1.328   4.418  1.00  0.00 
ATOM    531  C   UNK     1      -2.540  -8.428  -1.725  1.00  0.00 
ATOM    532  O   UNK     1      -1.465  -8.113  -2.239  1.00  0.00 
ATOM    533  N   UNK     1      -3.286  -7.593  -0.977  1.00  0.00 
ATOM    534  H   UNK     1      -3.030  -9.357  -2.019  1.00  0.00 
ATOM    535  C   UNK     1      -3.719  -6.266  -1.430  1.00  0.00 
ATOM    536  C   UNK     1      -3.787  -7.984   0.344  1.00  0.00 
ATOM    537  H   UNK     1      -4.800  -6.215  -1.581  1.00  0.00 
ATOM    538  H   UNK     1      -3.442  -5.480  -0.729  1.00  0.00 
ATOM    539  H   UNK     1      -3.370  -5.960  -2.421  1.00  0.00 
ATOM    540  H   UNK     1      -3.306  -7.390   1.123  1.00  0.00 
ATOM    541  H   UNK     1      -4.861  -7.805   0.430  1.00  0.00 
ATOM    542  H   UNK     1      -3.630  -9.030   0.624  1.00  0.00 
ATOM    543  C   UNK     1      10.963  -5.128  -6.513  1.00  0.00 
ATOM    544  O   UNK     1      11.772  -5.907  -7.019  1.00  0.00 
ATOM    545  N   UNK     1      10.542  -5.250  -5.241  1.00  0.00 
ATOM    546  H   UNK     1      10.700  -4.192  -7.007  1.00  0.00 
ATOM    547  C   UNK     1      11.336  -4.716  -4.134  1.00  0.00 
ATOM    548  C   UNK     1       9.273  -5.889  -4.888  1.00  0.00 
ATOM    549  H   UNK     1      10.750  -4.403  -3.267  1.00  0.00 
ATOM    550  H   UNK     1      12.117  -5.401  -3.808  1.00  0.00 
ATOM    551  H   UNK     1      11.769  -3.729  -4.310  1.00  0.00 
ATOM    552  H   UNK     1       9.429  -6.661  -4.133  1.00  0.00 
ATOM    553  H   UNK     1       8.574  -5.155  -4.480  1.00  0.00 
ATOM    554  H   UNK     1       8.757  -6.383  -5.715  1.00  0.00 
ATOM    555  C   UNK     1     -11.100  -6.563  -1.232  1.00  0.00 
ATOM    556  O   UNK     1     -11.953  -6.194  -2.040  1.00  0.00 
ATOM    557  N   UNK     1      -9.922  -5.943  -1.024  1.00  0.00 
ATOM    558  H   UNK     1     -11.368  -7.312  -0.483  1.00  0.00 
ATOM    559  C   UNK     1      -9.790  -4.498  -0.800  1.00  0.00 
ATOM    560  C   UNK     1      -8.671  -6.704  -0.976  1.00  0.00 
ATOM    561  H   UNK     1      -9.258  -4.257   0.123  1.00  0.00 
ATOM    562  H   UNK     1      -9.275  -4.008  -1.628  1.00  0.00 
ATOM    563  H   UNK     1     -10.719  -3.946  -0.643  1.00  0.00 
ATOM    564  H   UNK     1      -7.894  -6.233  -1.582  1.00  0.00 
ATOM    565  H   UNK     1      -8.292  -6.758   0.046  1.00  0.00 
ATOM    566  H   UNK     1      -8.723  -7.733  -1.343  1.00  0.00 
ATOM    567  C   UNK     1      -8.500   0.799   4.222  1.00  0.00 
ATOM    568  O   UNK     1      -8.907   1.635   5.028  1.00  0.00 
ATOM    569  N   UNK     1      -8.157  -0.463   4.561  1.00  0.00 
ATOM    570  H   UNK     1      -8.079   1.154   3.281  1.00  0.00 
ATOM    571  C   UNK     1      -9.077  -1.396   5.219  1.00  0.00 
ATOM    572  C   UNK     1      -6.797  -0.974   4.365  1.00  0.00 
ATOM    573  H   UNK     1      -9.268  -2.293   4.627  1.00  0.00 
ATOM    574  H   UNK     1      -8.713  -1.698   6.203  1.00  0.00 
ATOM    575  H   UNK     1     -10.106  -1.049   5.340  1.00  0.00 
ATOM    576  H   UNK     1      -6.260  -1.038   5.312  1.00  0.00 
ATOM    577  H   UNK     1      -6.804  -1.965   3.905  1.00  0.00 
ATOM    578  H   UNK     1      -6.179  -0.352   3.714  1.00  0.00 
ATOM    579  C   UNK     1       4.610  -4.573  -1.691  1.00  0.00 
ATOM    580  O   UNK     1       5.383  -3.623  -1.857  1.00  0.00 
ATOM    581  N   UNK     1       4.871  -5.822  -2.117  1.00  0.00 
ATOM    582  H   UNK     1       3.592  -4.395  -1.336  1.00  0.00 
ATOM    583  C   UNK     1       5.085  -6.140  -3.532  1.00  0.00 
ATOM    584  C   UNK     1       4.959  -6.950  -1.187  1.00  0.00 
ATOM    585  H   UNK     1       5.979  -6.741  -3.703  1.00  0.00 
ATOM    586  H   UNK     1       4.234  -6.652  -3.980  1.00  0.00 
ATOM    587  H   UNK     1       5.378  -5.304  -4.174  1.00  0.00 
ATOM    588  H   UNK     1       4.598  -7.884  -1.621  1.00  0.00 
ATOM    589  H   UNK     1       5.995  -7.113  -0.885  1.00  0.00 
ATOM    590  H   UNK     1       4.373  -6.823  -0.274  1.00  0.00 
ATOM    591  C   UNK     1      13.886  -6.685  -1.537  1.00  0.00 
ATOM    592  O   UNK     1      14.085  -5.643  -0.919  1.00  0.00 
ATOM    593  N   UNK     1      14.022  -7.901  -0.976  1.00  0.00 
ATOM    594  H   UNK     1      13.629  -6.659  -2.590  1.00  0.00 
ATOM    595  C   UNK     1      15.333  -8.535  -0.826  1.00  0.00 
ATOM    596  C   UNK     1      12.870  -8.708  -0.569  1.00  0.00 
ATOM    597  H   UNK     1      15.450  -9.044   0.130  1.00  0.00 
ATOM    598  H   UNK     1      15.598  -9.230  -1.629  1.00  0.00 
ATOM    599  H   UNK     1      16.168  -7.863  -0.622  1.00  0.00 
ATOM    600  H   UNK     1      12.721  -9.549  -1.251  1.00  0.00 
ATOM    601  H   UNK     1      13.007  -9.129   0.428  1.00  0.00 
ATOM    602  H   UNK     1      11.919  -8.171  -0.526  1.00  0.00 
ATOM    603  C   UNK     1     -15.808  -8.637   4.655  1.00  0.00 
ATOM    604  O   UNK     1     -14.722  -9.158   4.907  1.00  0.00 
ATOM    605  N   UNK     1     -16.504  -7.932   5.563  1.00  0.00 
ATOM    606  H   UNK     1     -16.000  -8.330   3.624  1.00  0.00 
ATOM    607  C   UNK     1     -17.787  -8.423   6.068  1.00  0.00 
ATOM    608  C   UNK     1     -16.163  -6.553   5.925  1.00  0.00 
ATOM    609  H   UNK     1     -18.024  -8.123   7.090  1.00  0.00 
ATOM    610  H   UNK     1     -18.642  -8.197   5.426  1.00  0.00 
ATOM    611  H   UNK     1     -17.812  -9.467   6.387  1.00  0.00 
ATOM    612  H   UNK     1     -16.847  -5.843   5.458  1.00  0.00 
ATOM    613  H   UNK     1     -16.234  -6.405   7.004  1.00  0.00 
ATOM    614  H   UNK     1     -15.148  -6.246   5.656  1.00  0.00 
ATOM    615  C   UNK     1       5.101   9.557   5.262  1.00  0.00 
ATOM    616  O   UNK     1       4.610  10.624   4.905  1.00  0.00 
ATOM    617  N   UNK     1       6.284   9.090   4.814  1.00  0.00 
ATOM    618  H   UNK     1       4.764   9.109   6.197  1.00  0.00 
ATOM    619  C   UNK     1       6.395   7.778   4.171  1.00  0.00 
ATOM    620  C   UNK     1       7.506   9.903   4.817  1.00  0.00 
ATOM    621  H   UNK     1       6.348   7.835   3.083  1.00  0.00 
ATOM    622  H   UNK     1       7.283   7.210   4.455  1.00  0.00 
ATOM    623  H   UNK     1       5.521   7.124   4.189  1.00  0.00 
ATOM    624  H   UNK     1       8.404   9.318   5.023  1.00  0.00 
ATOM    625  H   UNK     1       7.634  10.380   3.844  1.00  0.00 
ATOM    626  H   UNK     1       7.505  10.716   5.547  1.00  0.00 
ATOM    627  C   UNK     1      11.202   0.433   3.475  1.00  0.00 
ATOM    628  O   UNK     1      12.410   0.330   3.246  1.00  0.00 
ATOM    629  N   UNK     1      10.734   0.799   4.682  1.00  0.00 
ATOM    630  H   UNK     1      10.479   0.465   2.660  1.00  0.00 
ATOM    631  C   UNK     1      10.241  -0.195   5.641  1.00  0.00 
ATOM    632  C   UNK     1      10.822   2.181   5.160  1.00  0.00 
ATOM    633  H   UNK     1      10.882  -0.277   6.516  1.00  0.00 
ATOM    634  H   UNK     1       9.233   0.032   5.986  1.00  0.00 
ATOM    635  H   UNK     1      10.174  -1.214   5.256  1.00  0.00 
ATOM    636  H   UNK     1       9.931   2.489   5.707  1.00  0.00 
ATOM    637  H   UNK     1      11.678   2.286   5.828  1.00  0.00 
ATOM    638  H   UNK     1      10.950   2.930   4.373  1.00  0.00 
ATOM    639  C   UNK     1      -6.891   8.697   2.446  1.00  0.00 
ATOM    640  O   UNK     1      -6.576   7.877   3.315  1.00  0.00 
ATOM    641  N   UNK     1      -8.171   8.966   2.114  1.00  0.00 
ATOM    642  H   UNK     1      -6.164   9.449   2.135  1.00  0.00 
ATOM    643  C   UNK     1      -9.001   7.988   1.402  1.00  0.00 
ATOM    644  C   UNK     1      -8.770  10.292   2.307  1.00  0.00 
ATOM    645  H   UNK     1      -9.768   7.505   2.004  1.00  0.00 
ATOM    646  H   UNK     1      -9.452   8.354   0.480  1.00  0.00 
ATOM    647  H   UNK     1      -8.559   7.007   1.210  1.00  0.00 
ATOM    648  H   UNK     1      -9.551  10.519   1.576  1.00  0.00 
ATOM    649  H   UNK     1      -9.244  10.361   3.287  1.00  0.00 
ATOM    650  H   UNK     1      -8.064  11.123   2.230  1.00  0.00 
ATOM    651  C   UNK     1     -10.345  -6.215   5.633  1.00  0.00 
ATOM    652  O   UNK     1     -10.047  -5.739   4.545  1.00  0.00 
ATOM    653  N   UNK     1     -11.305  -7.150   5.793  1.00  0.00 
ATOM    654  H   UNK     1     -10.092  -5.654   6.543  1.00  0.00 
ATOM    655  C   UNK     1     -11.211  -8.449   5.118  1.00  0.00 
ATOM    656  C   UNK     1     -12.307  -7.055   6.861  1.00  0.00 
ATOM    657  H   UNK     1     -10.422  -9.064   5.549  1.00  0.00 
ATOM    658  H   UNK     1     -12.135  -9.038   5.159  1.00  0.00 
ATOM    659  H   UNK     1     -11.002  -8.343   4.052  1.00  0.00 
ATOM    660  H   UNK     1     -13.218  -7.608   6.625  1.00  0.00 
ATOM    661  H   UNK     1     -11.928  -7.485   7.791  1.00  0.00 
ATOM    662  H   UNK     1     -12.643  -6.038   7.070  1.00  0.00 
ATOM    663  C   UNK     1      -4.585   2.653   5.284  1.00  0.00 
ATOM    664  O   UNK     1      -4.550   1.424   5.365  1.00  0.00 
ATOM    665  N   UNK     1      -5.712   3.347   5.046  1.00  0.00 
ATOM    666  H   UNK     1      -3.665   3.231   5.184  1.00  0.00 
ATOM    667  C   UNK     1      -6.418   4.026   6.133  1.00  0.00 
ATOM    668  C   UNK     1      -6.229   3.550   3.689  1.00  0.00 
ATOM    669  H   UNK     1      -6.483   5.103   5.966  1.00  0.00 
ATOM    670  H   UNK     1      -7.432   3.632   6.218  1.00  0.00 
ATOM    671  H   UNK     1      -5.975   3.959   7.129  1.00  0.00 
ATOM    672  H   UNK     1      -7.320   3.564   3.660  1.00  0.00 
ATOM    673  H   UNK     1      -5.909   4.517   3.299  1.00  0.00 
ATOM    674  H   UNK     1      -5.940   2.786   2.961  1.00  0.00 
ATOM    675  C   UNK     1     -15.945   3.273  -2.899  1.00  0.00 
ATOM    676  O   UNK     1     -16.059   4.497  -2.858  1.00  0.00 
ATOM    677  N   UNK     1     -15.018   2.596  -2.196  1.00  0.00 
ATOM    678  H   UNK     1     -16.504   2.696  -3.637  1.00  0.00 
ATOM    679  C   UNK     1     -15.007   2.597  -0.729  1.00  0.00 
ATOM    680  C   UNK     1     -14.068   1.701  -2.867  1.00  0.00 
ATOM    681  H   UNK     1     -15.369   1.633  -0.369  1.00  0.00 
ATOM    682  H   UNK     1     -13.998   2.739  -0.341  1.00  0.00 
ATOM    683  H   UNK     1     -15.590   3.393  -0.262  1.00  0.00 
ATOM    684  H   UNK     1     -13.101   1.681  -2.360  1.00  0.00 
ATOM    685  H   UNK     1     -14.455   0.681  -2.889  1.00  0.00 
ATOM    686  H   UNK     1     -13.841   1.974  -3.902  1.00  0.00 
ATOM    687  C   UNK     1     -14.773   6.964  -0.888  1.00  0.00 
ATOM    688  O   UNK     1     -13.735   7.187  -0.261  1.00  0.00 
ATOM    689  N   UNK     1     -15.985   7.405  -0.492  1.00  0.00 
ATOM    690  H   UNK     1     -14.722   6.626  -1.926  1.00  0.00 
ATOM    691  C   UNK     1     -16.406   8.800  -0.674  1.00  0.00 
ATOM    692  C   UNK     1     -17.010   6.435  -0.104  1.00  0.00 
ATOM    693  H   UNK     1     -16.704   9.002  -1.702  1.00  0.00 
ATOM    694  H   UNK     1     -17.263   9.062  -0.038  1.00  0.00 
ATOM    695  H   UNK     1     -15.626   9.510  -0.373  1.00  0.00 
ATOM    696  H   UNK     1     -17.835   6.883   0.457  1.00  0.00 
ATOM    697  H   UNK     1     -17.442   5.954  -0.983  1.00  0.00 
ATOM    698  H   UNK     1     -16.627   5.649   0.550  1.00  0.00 
ATOM    699  C   UNK     1     -11.278   8.708  -6.276  1.00  0.00 
ATOM    700  O   UNK     1     -10.792   7.940  -7.110  1.00  0.00 
ATOM    701  N   UNK     1     -10.876   9.992  -6.186  1.00  0.00 
ATOM    702  H   UNK     1     -11.440   8.276  -5.274  1.00  0.00 
ATOM    703  C   UNK     1      -9.556  10.324  -5.650  1.00  0.00 
ATOM    704  C   UNK     1     -11.748  11.139  -6.453  1.00  0.00 
ATOM    705  H   UNK     1      -9.066  11.155  -6.161  1.00  0.00 
ATOM    706  H   UNK     1      -9.578  10.524  -4.579  1.00  0.00 
ATOM    707  H   UNK     1      -8.762   9.603  -5.858  1.00  0.00 
ATOM    708  H   UNK     1     -11.749  11.837  -5.613  1.00  0.00 
ATOM    709  H   UNK     1     -11.397  11.690  -7.328  1.00  0.00 
ATOM    710  H   UNK     1     -12.795  10.888  -6.633  1.00  0.00 
ATOM    711  C   UNK     1      15.030  -5.970   4.715  1.00  0.00 
ATOM    712  O   UNK     1      13.795  -6.060   4.751  1.00  0.00 
ATOM    713  N   UNK     1      15.834  -6.465   5.676  1.00  0.00 
ATOM    714  H   UNK     1      15.508  -5.850   3.741  1.00  0.00 
ATOM    715  C   UNK     1      15.718  -7.841   6.165  1.00  0.00 
ATOM    716  C   UNK     1      16.957  -5.690   6.216  1.00  0.00 
ATOM    717  H   UNK     1      16.677  -8.357   6.235  1.00  0.00 
ATOM    718  H   UNK     1      15.234  -7.877   7.142  1.00  0.00 
ATOM    719  H   UNK     1      15.206  -8.543   5.503  1.00  0.00 
ATOM    720  H   UNK     1      16.609  -4.857   6.828  1.00  0.00 
ATOM    721  H   UNK     1      17.639  -6.263   6.844  1.00  0.00 
ATOM    722  H   UNK     1      17.595  -5.279   5.432  1.00  0.00 
ATOM    723  C   UNK     1       0.201  -7.418   0.762  1.00  0.00 
ATOM    724  O   UNK     1      -0.551  -8.222   1.313  1.00  0.00 
ATOM    725  N   UNK     1       1.003  -6.568   1.436  1.00  0.00 
ATOM    726  H   UNK     1       0.372  -7.462  -0.306  1.00  0.00 
ATOM    727  C   UNK     1       2.314  -6.974   1.945  1.00  0.00 
ATOM    728  C   UNK     1       0.624  -5.183   1.731  1.00  0.00 
ATOM    729  H   UNK     1       3.082  -6.212   1.805  1.00  0.00 
ATOM    730  H   UNK     1       2.290  -7.246   3.002  1.00  0.00 
ATOM    731  H   UNK     1       2.821  -7.764   1.388  1.00  0.00 
ATOM    732  H   UNK     1       0.779  -4.958   2.789  1.00  0.00 
ATOM    733  H   UNK     1       1.238  -4.465   1.187  1.00  0.00 
ATOM    734  H   UNK     1      -0.416  -4.932   1.524  1.00  0.00 
ATOM    735  C   UNK     1      -9.969  -6.650  -4.618  1.00  0.00 
ATOM    736  O   UNK     1      -8.943  -7.275  -4.347  1.00  0.00 
ATOM    737  N   UNK     1     -10.889  -7.105  -5.486  1.00  0.00 
ATOM    738  H   UNK     1     -10.051  -5.598  -4.355  1.00  0.00 
ATOM    739  C   UNK     1     -10.752  -6.898  -6.928  1.00  0.00 
ATOM    740  C   UNK     1     -12.121  -7.726  -4.994  1.00  0.00 
ATOM    741  H   UNK     1     -11.301  -7.619  -7.538  1.00  0.00 
ATOM    742  H   UNK     1     -10.999  -5.889  -7.264  1.00  0.00 
ATOM    743  H   UNK     1      -9.779  -7.202  -7.324  1.00  0.00 
ATOM    744  H   UNK     1     -12.787  -6.966  -4.600  1.00  0.00 
ATOM    745  H   UNK     1     -12.683  -8.245  -5.765  1.00  0.00 
ATOM    746  H   UNK     1     -11.950  -8.447  -4.199  1.00  0.00 
ATOM    747  C   UNK     1      -3.163  -8.050  -5.593  1.00  0.00 
ATOM    748  O   UNK     1      -3.940  -8.322  -6.497  1.00  0.00 
ATOM    749  N   UNK     1      -2.002  -7.395  -5.792  1.00  0.00 
ATOM    750  H   UNK     1      -3.500  -8.092  -4.565  1.00  0.00 
ATOM    751  C   UNK     1      -0.746  -8.145  -5.909  1.00  0.00 
ATOM    752  C   UNK     1      -1.978  -5.939  -5.980  1.00  0.00 
ATOM    753  H   UNK     1      -0.714  -8.698  -6.851  1.00  0.00 
ATOM    754  H   UNK     1       0.146  -7.518  -5.880  1.00  0.00 
ATOM    755  H   UNK     1      -0.605  -8.858  -5.091  1.00  0.00 
ATOM    756  H   UNK     1      -0.981  -5.499  -5.919  1.00  0.00 
ATOM    757  H   UNK     1      -2.366  -5.678  -6.967  1.00  0.00 
ATOM    758  H   UNK     1      -2.581  -5.404  -5.243  1.00  0.00 
ATOM    759  C   UNK     1     -11.194   4.841  -4.396  1.00  0.00 
ATOM    760  O   UNK     1     -12.070   4.119  -3.914  1.00  0.00 
ATOM    761  N   UNK     1     -10.544   4.521  -5.533  1.00  0.00 
ATOM    762  H   UNK     1     -11.182   5.903  -4.151  1.00  0.00 
ATOM    763  C   UNK     1      -9.091   4.335  -5.585  1.00  0.00 
ATOM    764  C   UNK     1     -11.193   4.588  -6.845  1.00  0.00 
ATOM    765  H   UNK     1      -8.792   3.452  -6.153  1.00  0.00 
ATOM    766  H   UNK     1      -8.544   5.195  -5.980  1.00  0.00 
ATOM    767  H   UNK     1      -8.611   3.999  -4.656  1.00  0.00 
ATOM    768  H   UNK     1     -10.690   5.311  -7.489  1.00  0.00 
ATOM    769  H   UNK     1     -11.148   3.627  -7.357  1.00  0.00 
ATOM    770  H   UNK     1     -12.250   4.873  -6.838  1.00  0.00 
ATOM    771  C   UNK     1      16.720   4.726   5.910  1.00  0.00 
ATOM    772  O   UNK     1      15.842   4.229   5.204  1.00  0.00 
ATOM    773  N   UNK     1      16.889   6.049   6.063  1.00  0.00 
ATOM    774  H   UNK     1      17.570   4.117   6.234  1.00  0.00 
ATOM    775  C   UNK     1      17.404   6.891   4.978  1.00  0.00 
ATOM    776  C   UNK     1      16.789   6.693   7.375  1.00  0.00 
ATOM    777  H   UNK     1      17.009   7.909   4.972  1.00  0.00 
ATOM    778  H   UNK     1      18.492   6.940   4.941  1.00  0.00 
ATOM    779  H   UNK     1      17.011   6.660   3.986  1.00  0.00 
ATOM    780  H   UNK     1      17.780   6.895   7.785  1.00  0.00 
ATOM    781  H   UNK     1      16.259   7.645   7.305  1.00  0.00 
ATOM    782  H   UNK     1      16.244   6.120   8.130  1.00  0.00 
ATOM    783  C   UNK     1      -2.974   4.788  -5.832  1.00  0.00 
ATOM    784  O   UNK     1      -3.332   3.975  -6.684  1.00  0.00 
ATOM    785  N   UNK     1      -2.190   4.450  -4.792  1.00  0.00 
ATOM    786  H   UNK     1      -3.069   5.858  -6.024  1.00  0.00 
ATOM    787  C   UNK     1      -2.678   4.518  -3.415  1.00  0.00 
ATOM    788  C   UNK     1      -0.769   4.124  -4.927  1.00  0.00 
ATOM    789  H   UNK     1      -2.497   3.618  -2.824  1.00  0.00 
ATOM    790  H   UNK     1      -2.323   5.380  -2.851  1.00  0.00 
ATOM    791  H   UNK     1      -3.748   4.376  -3.266  1.00  0.00 
ATOM    792  H   UNK     1      -0.154   4.813  -4.344  1.00  0.00 
ATOM    793  H   UNK     1      -0.570   3.120  -4.550  1.00  0.00 
ATOM    794  H   UNK     1      -0.391   4.165  -5.952  1.00  0.00 
CONECT    1    2    6   40
CONECT    2    1    3   37
CONECT    3    2    4   11
CONECT    4    3    5    7
CONECT    5    4    6   10
CONECT    6    1    5   39
CONECT    7    4    8   13
CONECT    8    7    9   14
CONECT    9    8   10   44
CONECT   10    5    9   45
CONECT   11    3   12   48
CONECT   12   11   13   47
CONECT   13    7   12   46
CONECT   14    8   15
CONECT   15   14   16
CONECT   16   15   17   21
CONECT   17   16   18   41
CONECT   18   17   19   42
CONECT   19   18   20   22
CONECT   20   19   21   43
CONECT   21   16   20   62
CONECT   22   19   23
CONECT   23   22   24
CONECT   24   23   25   29
CONECT   25   24   26   49
CONECT   26   25   27   50
CONECT   27   26   28   32
CONECT   28   27   29   30
CONECT   29   24   28   52
CONECT   30   28   31   33
CONECT   31   30   32   36
CONECT   32   27   31   38
CONECT   33   30   34   51
CONECT   34   33   35   55
CONECT   35   34   36   54
CONECT   36   31   35   53
CONECT   37    2
CONECT   38   32   56   57   58
CONECT   39    6
CONECT   40    1   59   60   61
CONECT   41   17
CONECT   42   18
CONECT   43   20
CONECT   44    9
CONECT   45   10
CONECT   46   13
CONECT   47   12
CONECT   48   11
CONECT   49   25
CONECT   50   26
CONECT   51   33
CONECT   52   29
CONECT   53   36
CONECT   54   35
CONECT   55   34
CONECT   56   38
CONECT   57   38
CONECT   58   38
CONECT   59   40
CONECT   60   40
CONECT   61   40
CONECT   62   21
CONECT   63   64   65   66
CONECT   64   63
CONECT   65   63   67   68
CONECT   66   63
CONECT   67   65   69   70   71
CONECT   68   65   72   73   74
CONECT   69   67
CONECT   70   67
CONECT   71   67
CONECT   72   68
CONECT   73   68
CONECT   74   68
CONECT   75   76   77   78
CONECT   76   75
CONECT   77   75   79   80
CONECT   78   75
CONECT   79   77   81   82   83
CONECT   80   77   84   85   86
CONECT   81   79
CONECT   82   79
CONECT   83   79
CONECT   84   80
CONECT   85   80
CONECT   86   80
CONECT   87   88   89   90
CONECT   88   87
CONECT   89   87   91   92
CONECT   90   87
CONECT   91   89   93   94   95
CONECT   92   89   96   97   98
CONECT   93   91
CONECT   94   91
CONECT   95   91
CONECT   96   92
CONECT   97   92
CONECT   98   92
CONECT   99  100  101  102
CONECT  100   99
CONECT  101   99  103  104
CONECT  102   99
CONECT  103  101  105  106  107
CONECT  104  101  108  109  110
CONECT  105  103
CONECT  106  103
CONECT  107  103
CONECT  108  104
CONECT  109  104
CONECT  110  104
CONECT  111  112  113  114
CONECT  112  111
CONECT  113  111  115  116
CONECT  114  111
CONECT  115  113  117  118  119
CONECT  116  113  120  121  122
CONECT  117  115
CONECT  118  115
CONECT  119  115
CONECT  120  116
CONECT  121  116
CONECT  122  116
CONECT  123  124  125  126
CONECT  124  123
CONECT  125  123  127  128
CONECT  126  123
CONECT  127  125  129  130  131
CONECT  128  125  132  133  134
CONECT  129  127
CONECT  130  127
CONECT  131  127
CONECT  132  128
CONECT  133  128
CONECT  134  128
CONECT  135  136  137  138
CONECT  136  135
CONECT  137  135  139  140
CONECT  138  135
CONECT  139  137  141  142  143
CONECT  140  137  144  145  146
CONECT  141  139
CONECT  142  139
CONECT  143  139
CONECT  144  140
CONECT  145  140
CONECT  146  140
CONECT  147  148  149  150
CONECT  148  147
CONECT  149  147  151  152
CONECT  150  147
CONECT  151  149  153  154  155
CONECT  152  149  156  157  158
CONECT  153  151
CONECT  154  151
CONECT  155  151
CONECT  156  152
CONECT  157  152
CONECT  158  152
CONECT  159  160  161  162
CONECT  160  159
CONECT  161  159  163  164
CONECT  162  159
CONECT  163  161  165  166  167
CONECT  164  161  168  169  170
CONECT  165  163
CONECT  166  163
CONECT  167  163
CONECT  168  164
CONECT  169  164
CONECT  170  164
CONECT  171  172  173  174
CONECT  172  171
CONECT  173  171  175  176
CONECT  174  171
CONECT  175  173  177  178  179
CONECT  176  173  180  181  182
CONECT  177  175
CONECT  178  175
CONECT  179  175
CONECT  180  176
CONECT  181  176
CONECT  182  176
CONECT  183  184  185  186
CONECT  184  183
CONECT  185  183  187  188
CONECT  186  183
CONECT  187  185  189  190  191
CONECT  188  185  192  193  194
CONECT  189  187
CONECT  190  187
CONECT  191  187
CONECT  192  188
CONECT  193  188
CONECT  194  188
CONECT  195  196  197  198
CONECT  196  195
CONECT  197  195  199  200
CONECT  198  195
CONECT  199  197  201  202  203
CONECT  200  197  204  205  206
CONECT  201  199
CONECT  202  199
CONECT  203  199
CONECT  204  200
CONECT  205  200
CONECT  206  200
CONECT  207  208  209  210
CONECT  208  207
CONECT  209  207  211  212
CONECT  210  207
CONECT  211  209  213  214  215
CONECT  212  209  216  217  218
CONECT  213  211
CONECT  214  211
CONECT  215  211
CONECT  216  212
CONECT  217  212
CONECT  218  212
CONECT  219  220  221  222
CONECT  220  219
CONECT  221  219  223  224
CONECT  222  219
CONECT  223  221  225  226  227
CONECT  224  221  228  229  230
CONECT  225  223
CONECT  226  223
CONECT  227  223
CONECT  228  224
CONECT  229  224
CONECT  230  224
CONECT  231  232  233  234
CONECT  232  231
CONECT  233  231  235  236
CONECT  234  231
CONECT  235  233  237  238  239
CONECT  236  233  240  241  242
CONECT  237  235
CONECT  238  235
CONECT  239  235
CONECT  240  236
CONECT  241  236
CONECT  242  236
CONECT  243  244  245  246
CONECT  244  243
CONECT  245  243  247  248
CONECT  246  243
CONECT  247  245  249  250  251
CONECT  248  245  252  253  254
CONECT  249  247
CONECT  250  247
CONECT  251  247
CONECT  252  248
CONECT  253  248
CONECT  254  248
CONECT  255  256  257  258
CONECT  256  255
CONECT  257  255  259  260
CONECT  258  255
CONECT  259  257  261  262  263
CONECT  260  257  264  265  266
CONECT  261  259
CONECT  262  259
CONECT  263  259
CONECT  264  260
CONECT  265  260
CONECT  266  260
CONECT  267  268  269  270
CONECT  268  267
CONECT  269  267  271  272
CONECT  270  267
CONECT  271  269  273  274  275
CONECT  272  269  276  277  278
CONECT  273  271
CONECT  274  271
CONECT  275  271
CONECT  276  272
CONECT  277  272
CONECT  278  272
CONECT  279  280  281  282
CONECT  280  279
CONECT  281  279  283  284
CONECT  282  279
CONECT  283  281  285  286  287
CONECT  284  281  288  289  290
CONECT  285  283
CONECT  286  283
CONECT  287  283
CONECT  288  284
CONECT  289  284
CONECT  290  284
CONECT  291  292  293  294
CONECT  292  291
CONECT  293  291  295  296
CONECT  294  291
CONECT  295  293  297  298  299
CONECT  296  293  300  301  302
CONECT  297  295
CONECT  298  295
CONECT  299  295
CONECT  300  296
CONECT  301  296
CONECT  302  296
CONECT  303  304  305  306
CONECT  304  303
CONECT  305  303  307  308
CONECT  306  303
CONECT  307  305  309  310  311
CONECT  308  305  312  313  314
CONECT  309  307
CONECT  310  307
CONECT  311  307
CONECT  312  308
CONECT  313  308
CONECT  314  308
CONECT  315  316  317  318
CONECT  316  315
CONECT  317  315  319  320
CONECT  318  315
CONECT  319  317  321  322  323
CONECT  320  317  324  325  326
CONECT  321  319
CONECT  322  319
CONECT  323  319
CONECT  324  320
CONECT  325  320
CONECT  326  320
CONECT  327  328  329  330
CONECT  328  327
CONECT  329  327  331  332
CONECT  330  327
CONECT  331  329  333  334  335
CONECT  332  329  336  337  338
CONECT  333  331
CONECT  334  331
CONECT  335  331
CONECT  336  332
CONECT  337  332
CONECT  338  332
CONECT  339  340  341  342
CONECT  340  339
CONECT  341  339  343  344
CONECT  342  339
CONECT  343  341  345  346  347
CONECT  344  341  348  349  350
CONECT  345  343
CONECT  346  343
CONECT  347  343
CONECT  348  344
CONECT  349  344
CONECT  350  344
CONECT  351  352  353  354
CONECT  352  351
CONECT  353  351  355  356
CONECT  354  351
CONECT  355  353  357  358  359
CONECT  356  353  360  361  362
CONECT  357  355
CONECT  358  355
CONECT  359  355
CONECT  360  356
CONECT  361  356
CONECT  362  356
CONECT  363  364  365  366
CONECT  364  363
CONECT  365  363  367  368
CONECT  366  363
CONECT  367  365  369  370  371
CONECT  368  365  372  373  374
CONECT  369  367
CONECT  370  367
CONECT  371  367
CONECT  372  368
CONECT  373  368
CONECT  374  368
CONECT  375  376  377  378
CONECT  376  375
CONECT  377  375  379  380
CONECT  378  375
CONECT  379  377  381  382  383
CONECT  380  377  384  385  386
CONECT  381  379
CONECT  382  379
CONECT  383  379
CONECT  384  380
CONECT  385  380
CONECT  386  380
CONECT  387  388  389  390
CONECT  388  387
CONECT  389  387  391  392
CONECT  390  387
CONECT  391  389  393  394  395
CONECT  392  389  396  397  398
CONECT  393  391
CONECT  394  391
CONECT  395  391
CONECT  396  392
CONECT  397  392
CONECT  398  392
CONECT  399  400  401  402
CONECT  400  399
CONECT  401  399  403  404
CONECT  402  399
CONECT  403  401  405  406  407
CONECT  404  401  408  409  410
CONECT  405  403
CONECT  406  403
CONECT  407  403
CONECT  408  404
CONECT  409  404
CONECT  410  404
CONECT  411  412  413  414
CONECT  412  411
CONECT  413  411  415  416
CONECT  414  411
CONECT  415  413  417  418  419
CONECT  416  413  420  421  422
CONECT  417  415
CONECT  418  415
CONECT  419  415
CONECT  420  416
CONECT  421  416
CONECT  422  416
CONECT  423  424  425  426
CONECT  424  423
CONECT  425  423  427  428
CONECT  426  423
CONECT  427  425  429  430  431
CONECT  428  425  432  433  434
CONECT  429  427
CONECT  430  427
CONECT  431  427
CONECT  432  428
CONECT  433  428
CONECT  434  428
CONECT  435  436  437  438
CONECT  436  435
CONECT  437  435  439  440
CONECT  438  435
CONECT  439  437  441  442  443
CONECT  440  437  444  445  446
CONECT  441  439
CONECT  442  439
CONECT  443  439
CONECT  444  440
CONECT  445  440
CONECT  446  440
CONECT  447  448  449  450
CONECT  448  447
CONECT  449  447  451  452
CONECT  450  447
CONECT  451  449  453  454  455
CONECT  452  449  456  457  458
CONECT  453  451
CONECT  454  451
CONECT  455  451
CONECT  456  452
CONECT  457  452
CONECT  458  452
CONECT  459  460  461  462
CONECT  460  459
CONECT  461  459  463  464
CONECT  462  459
CONECT  463  461  465  466  467
CONECT  464  461  468  469  470
CONECT  465  463
CONECT  466  463
CONECT  467  463
CONECT  468  464
CONECT  469  464
CONECT  470  464
CONECT  471  472  473  474
CONECT  472  471
CONECT  473  471  475  476
CONECT  474  471
CONECT  475  473  477  478  479
CONECT  476  473  480  481  482
CONECT  477  475
CONECT  478  475
CONECT  479  475
CONECT  480  476
CONECT  481  476
CONECT  482  476
CONECT  483  484  485  486
CONECT  484  483
CONECT  485  483  487  488
CONECT  486  483
CONECT  487  485  489  490  491
CONECT  488  485  492  493  494
CONECT  489  487
CONECT  490  487
CONECT  491  487
CONECT  492  488
CONECT  493  488
CONECT  494  488
CONECT  495  496  497  498
CONECT  496  495
CONECT  497  495  499  500
CONECT  498  495
CONECT  499  497  501  502  503
CONECT  500  497  504  505  506
CONECT  501  499
CONECT  502  499
CONECT  503  499
CONECT  504  500
CONECT  505  500
CONECT  506  500
CONECT  507  508  509  510
CONECT  508  507
CONECT  509  507  511  512
CONECT  510  507
CONECT  511  509  513  514  515
CONECT  512  509  516  517  518
CONECT  513  511
CONECT  514  511
CONECT  515  511
CONECT  516  512
CONECT  517  512
CONECT  518  512
CONECT  519  520  521  522
CONECT  520  519
CONECT  521  519  523  524
CONECT  522  519
CONECT  523  521  525  526  527
CONECT  524  521  528  529  530
CONECT  525  523
CONECT  526  523
CONECT  527  523
CONECT  528  524
CONECT  529  524
CONECT  530  524
CONECT  531  532  533  534
CONECT  532  531
CONECT  533  531  535  536
CONECT  534  531
CONECT  535  533  537  538  539
CONECT  536  533  540  541  542
CONECT  537  535
CONECT  538  535
CONECT  539  535
CONECT  540  536
CONECT  541  536
CONECT  542  536
CONECT  543  544  545  546
CONECT  544  543
CONECT  545  543  547  548
CONECT  546  543
CONECT  547  545  549  550  551
CONECT  548  545  552  553  554
CONECT  549  547
CONECT  550  547
CONECT  551  547
CONECT  552  548
CONECT  553  548
CONECT  554  548
CONECT  555  556  557  558
CONECT  556  555
CONECT  557  555  559  560
CONECT  558  555
CONECT  559  557  561  562  563
CONECT  560  557  564  565  566
CONECT  561  559
CONECT  562  559
CONECT  563  559
CONECT  564  560
CONECT  565  560
CONECT  566  560
CONECT  567  568  569  570
CONECT  568  567
CONECT  569  567  571  572
CONECT  570  567
CONECT  571  569  573  574  575
CONECT  572  569  576  577  578
CONECT  573  571
CONECT  574  571
CONECT  575  571
CONECT  576  572
CONECT  577  572
CONECT  578  572
CONECT  579  580  581  582
CONECT  580  579
CONECT  581  579  583  584
CONECT  582  579
CONECT  583  581  585  586  587
CONECT  584  581  588  589  590
CONECT  585  583
CONECT  586  583
CONECT  587  583
CONECT  588  584
CONECT  589  584
CONECT  590  584
CONECT  591  592  593  594
CONECT  592  591
CONECT  593  591  595  596
CONECT  594  591
CONECT  595  593  597  598  599
CONECT  596  593  600  601  602
CONECT  597  595
CONECT  598  595
CONECT  599  595
CONECT  600  596
CONECT  601  596
CONECT  602  596
CONECT  603  604  605  606
CONECT  604  603
CONECT  605  603  607  608
CONECT  606  603
CONECT  607  605  609  610  611
CONECT  608  605  612  613  614
CONECT  609  607
CONECT  610  607
CONECT  611  607
CONECT  612  608
CONECT  613  608
CONECT  614  608
CONECT  615  616  617  618
CONECT  616  615
CONECT  617  615  619  620
CONECT  618  615
CONECT  619  617  621  622  623
CONECT  620  617  624  625  626
CONECT  621  619
CONECT  622  619
CONECT  623  619
CONECT  624  620
CONECT  625  620
CONECT  626  620
CONECT  627  628  629  630
CONECT  628  627
CONECT  629  627  631  632
CONECT  630  627
CONECT  631  629  633  634  635
CONECT  632  629  636  637  638
CONECT  633  631
CONECT  634  631
CONECT  635  631
CONECT  636  632
CONECT  637  632
CONECT  638  632
CONECT  639  640  641  642
CONECT  640  639
CONECT  641  639  643  644
CONECT  642  639
CONECT  643  641  645  646  647
CONECT  644  641  648  649  650
CONECT  645  643
CONECT  646  643
CONECT  647  643
CONECT  648  644
CONECT  649  644
CONECT  650  644
CONECT  651  652  653  654
CONECT  652  651
CONECT  653  651  655  656
CONECT  654  651
CONECT  655  653  657  658  659
CONECT  656  653  660  661  662
CONECT  657  655
CONECT  658  655
CONECT  659  655
CONECT  660  656
CONECT  661  656
CONECT  662  656
CONECT  663  664  665  666
CONECT  664  663
CONECT  665  663  667  668
CONECT  666  663
CONECT  667  665  669  670  671
CONECT  668  665  672  673  674
CONECT  669  667
CONECT  670  667
CONECT  671  667
CONECT  672  668
CONECT  673  668
CONECT  674  668
CONECT  675  676  677  678
CONECT  676  675
CONECT  677  675  679  680
CONECT  678  675
CONECT  679  677  681  682  683
CONECT  680  677  684  685  686
CONECT  681  679
CONECT  682  679
CONECT  683  679
CONECT  684  680
CONECT  685  680
CONECT  686  680
CONECT  687  688  689  690
CONECT  688  687
CONECT  689  687  691  692
CONECT  690  687
CONECT  691  689  693  694  695
CONECT  692  689  696  697  698
CONECT  693  691
CONECT  694  691
CONECT  695  691
CONECT  696  692
CONECT  697  692
CONECT  698  692
CONECT  699  700  701  702
CONECT  700  699
CONECT  701  699  703  704
CONECT  702  699
CONECT  703  701  705  706  707
CONECT  704  701  708  709  710
CONECT  705  703
CONECT  706  703
CONECT  707  703
CONECT  708  704
CONECT  709  704
CONECT  710  704
CONECT  711  712  713  714
CONECT  712  711
CONECT  713  711  715  716
CONECT  714  711
CONECT  715  713  717  718  719
CONECT  716  713  720  721  722
CONECT  717  715
CONECT  718  715
CONECT  719  715
CONECT  720  716
CONECT  721  716
CONECT  722  716
CONECT  723  724  725  726
CONECT  724  723
CONECT  725  723  727  728
CONECT  726  723
CONECT  727  725  729  730  731
CONECT  728  725  732  733  734
CONECT  729  727
CONECT  730  727
CONECT  731  727
CONECT  732  728
CONECT  733  728
CONECT  734  728
CONECT  735  736  737  738
CONECT  736  735
CONECT  737  735  739  740
CONECT  738  735
CONECT  739  737  741  742  743
CONECT  740  737  744  745  746
CONECT  741  739
CONECT  742  739
CONECT  743  739
CONECT  744  740
CONECT  745  740
CONECT  746  740
CONECT  747  748  749  750
CONECT  748  747
CONECT  749  747  751  752
CONECT  750  747
CONECT  751  749  753  754  755
CONECT  752  749  756  757  758
CONECT  753  751
CONECT  754  751
CONECT  755  751
CONECT  756  752
CONECT  757  752
CONECT  758  752
CONECT  759  760  761  762
CONECT  760  759
CONECT  761  759  763  764
CONECT  762  759
CONECT  763  761  765  766  767
CONECT  764  761  768  769  770
CONECT  765  763
CONECT  766  763
CONECT  767  763
CONECT  768  764
CONECT  769  764
CONECT  770  764
CONECT  771  772  773  774
CONECT  772  771
CONECT  773  771  775  776
CONECT  774  771
CONECT  775  773  777  778  779
CONECT  776  773  780  781  782
CONECT  777  775
CONECT  778  775
CONECT  779  775
CONECT  780  776
CONECT  781  776
CONECT  782  776
CONECT  783  784  785  786
CONECT  784  783
CONECT  785  783  787  788
CONECT  786  783
CONECT  787  785  789  790  791
CONECT  788  785  792  793  794
CONECT  789  787
CONECT  790  787
CONECT  791  787
CONECT  792  788
CONECT  793  788
CONECT  794  788
MASTER        0    0    0    0    0    0    0    0  794    0  794    0
END
